# Supplementary material for: Optimal Timing of Percutaneous Coronary Intervention for Nonculprit Vessel in Patients with ST-Segment Elevation Myocardial Infarction and Multivessel Disease
Source: PubMed Central journal article supplement — Korean Circ J. 2016 Dec 12;47(1):36–43. doi: 10.4070/kcj.2015.0358 (PMC5287185; doi:10.4070/kcj.2015.0358), 2016-12-12
Supplement: kcj-47-36-s001.pdf [file kcj-47-36-s001.pdf]

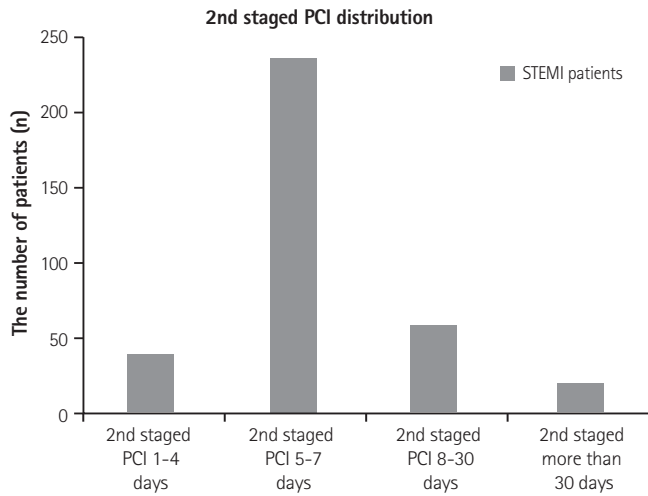

**Supplementary Fig. 1.** Time distribution of second staged PCI in STEMI patients with multivessel disease. PCI: percutaneous coronary intervention, STEMI: ST-segment elevation myocardial infarction.
